# Supplementary material for: Fabricating High-Resolution and High-Dimensional Microneedle Mold through the Resolution Improvement of Stereolithography 3D Printing
Source: MDPI journal article supplement (doi:10.3390/pharmaceutics14040766), 2022-03-31
Supplement: s1 [file s1]

# Fabricating High-Resolution and High-Dimensional Microneedle Mold Through the Resolution Improvement of Stereolithography 3D Printing

Sangmin Choo, Sung Gyu Jin \* and Jae Hwan Jung \*

- CMC-Na solution
- PVP K-30 solution

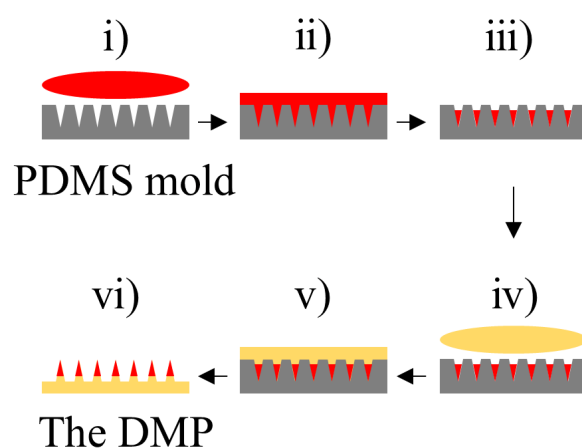

**Figure S1.** Schematic illustrating the fabrication of a dissolving microneedle patch (DMP). (i) Casting of 1st cast solution. (ii) Vacuum for 1 h. (iii) Remove excess solution and dry for 1 h. (iv) Casting of 2nd cast solution. (v) Vacuum for 1 h. (vi) Dry for 24 h at 25 °C and peel off from PDMS mold.

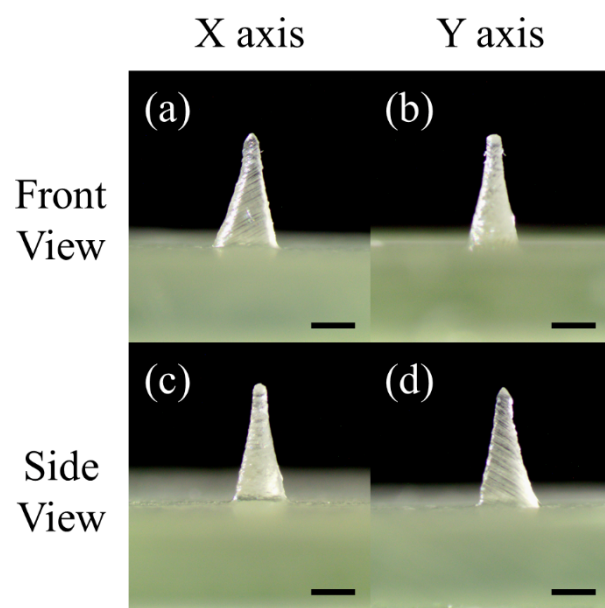

**Figure S2.** Effect of the axis direction and the printing angle on the microneedle tip printing. The microneedle images 3d printed at 45° printing angle to the x-axis: front view (a) and side view (c); at 45° printing angle to the y-axis: front view (b) and side view (d) (scale bar is 0.5 mm).

**Table S1.** Dimension of the microneedle tip diameter 3d printed at the x or y single-axis with 45 ° printing angle (n = 7).

| Printing Degree<br>of x-y Axis    | 45° (x Axis)<br>(Front View) | 45° (x Axis)<br>(Side View) | 45° (y Axis)<br>(Front View) | 45° (y Axis)<br>(Side View) |
|-----------------------------------|------------------------------|-----------------------------|------------------------------|-----------------------------|
| Tip diameter<br>( $\mu\text{m}$ ) | $92.2 \pm 2.3$               | $131.3 \pm 2.5$             | $131.7 \pm 1.6$              | $92.3 \pm 2.6$              |

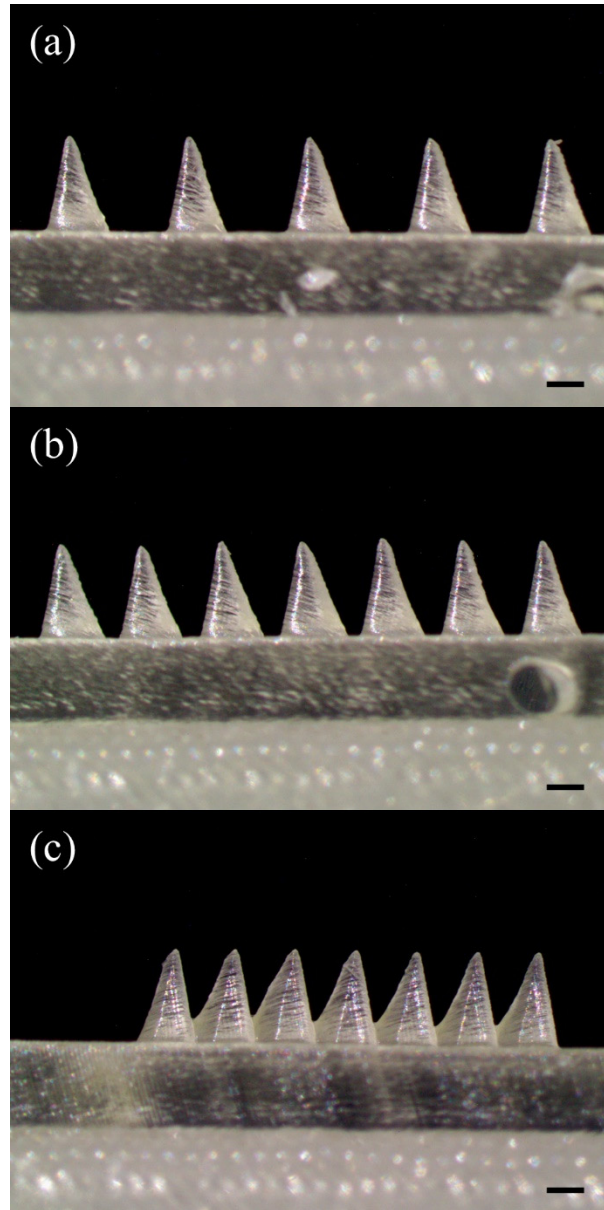

**Figure S3.** Effect of the spacing between the microneedles on the microneedle tip printing. Stereomicroscopic images of the microneedles (1300  $\mu\text{m}$  input height and 500  $\mu\text{m}$  base) at the spacing of 1000  $\mu\text{m}$  (a), 500  $\mu\text{m}$  (b), and 250  $\mu\text{m}$  (c). (n = 7, scale bar is 0.5 mm).

**Table S2.** Dimensions of the printed microneedles at different spacing between the microneedles 1000  $\mu\text{m}$ , 500  $\mu\text{m}$ , and 250  $\mu\text{m}$  (n = 7).

| Spacing between the Microneedles | Design | 1000 $\mu\text{m}$ | 500 $\mu\text{m}$ | 250 $\mu\text{m}$ |
|----------------------------------|--------|--------------------|-------------------|-------------------|
| Tip diameter ( $\mu\text{m}$ )   |        | $30.2 \pm 3.4$     | $30.3 \pm 3.5$    | $30.4 \pm 4.5$    |
| Height ( $\mu\text{m}$ )         | 1300   | $1200 \pm 10$      | $1200 \pm 20$     | $1210 \pm 20$     |
| Base ( $\mu\text{m}$ )           | 500    | $490 \pm 20$       | $490 \pm 10$      | $490 \pm 10$      |

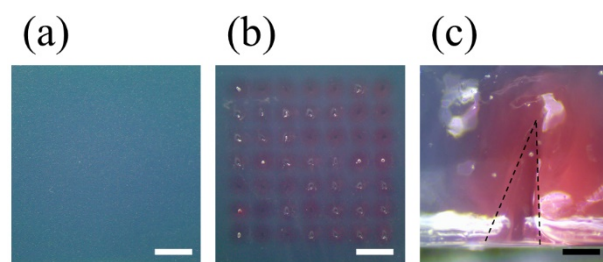

**Figure S4.** Penetration test of DMP into the agarose gel in vitro. Images of the agarose gel before (a) and after (b), and cross-section of the agarose gel (c) after the agarose gel penetration test (the white scale bars and black scale bar are 2.0 mm and 0.5 mm, respectively).

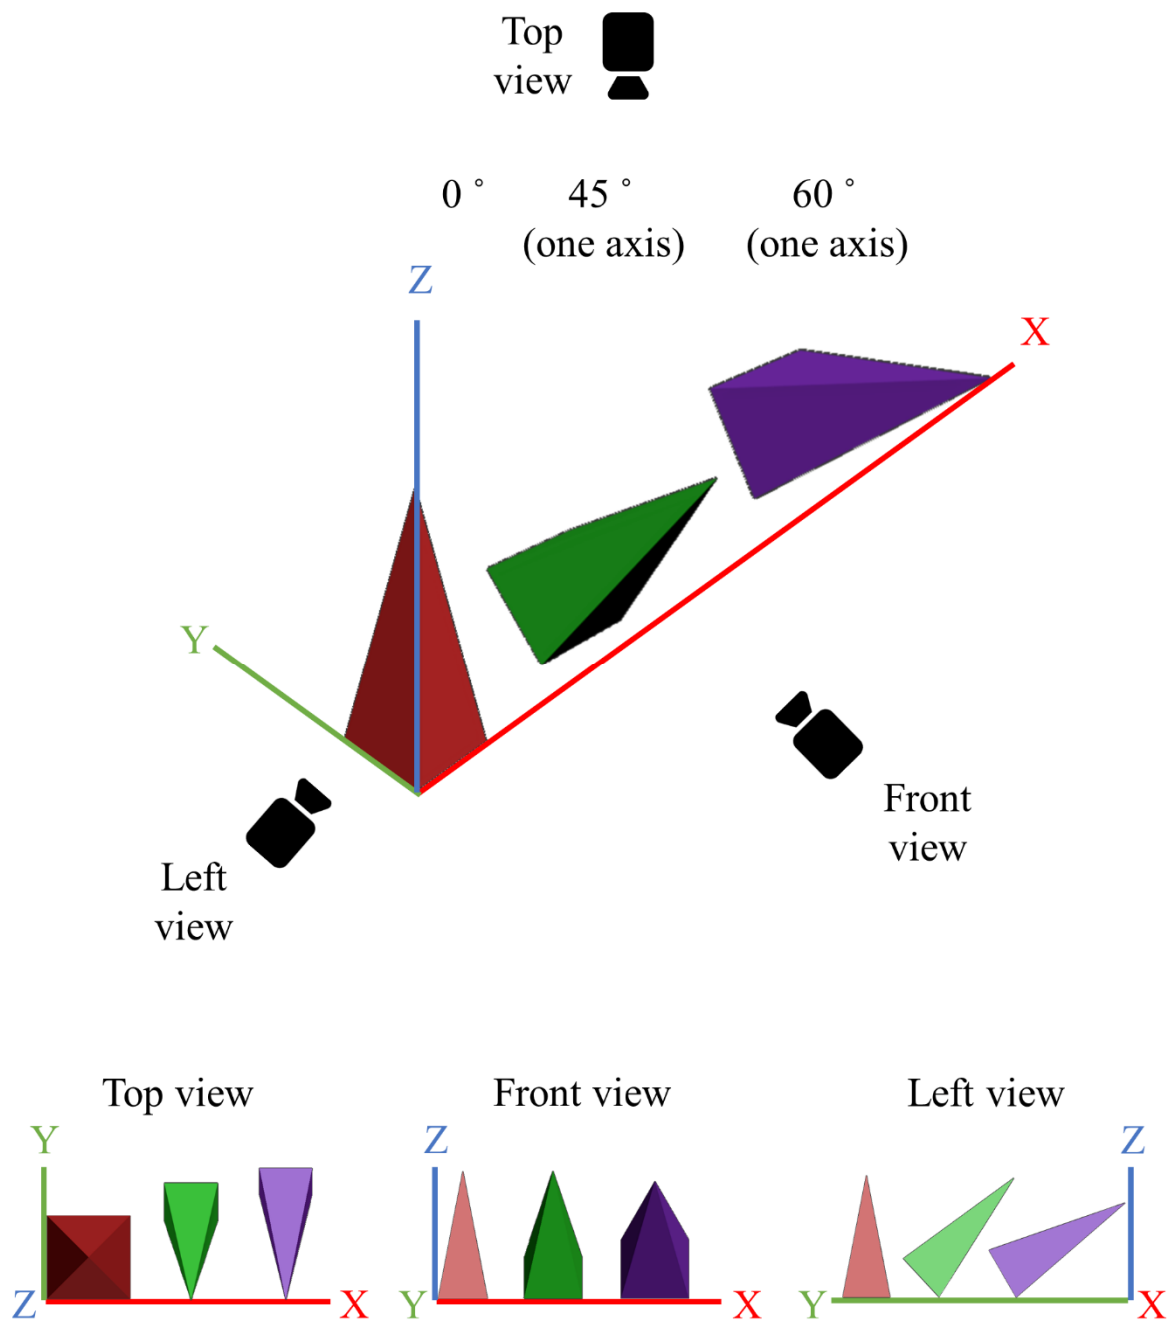

**Figure S5.** 3D designs of the microneedles, which were rotated at printing angles of 0°, 45°, and 60° relative to the x-axis.

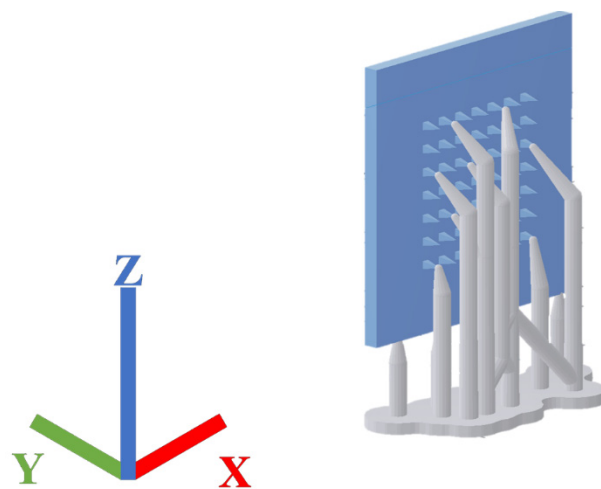

**Figure S6.** 3D designs of the microneedles, which were rotated at a printing angle of 90°. Supports around the microneedle tips were generated due to the unstable position of the microneedles at a 90° printing angle.
